# Supplementary material
Source: Springer Nature journal article supplement (https://www.springermedizin.de/resource/supplementary/12950_2010_169_MOESM7_ESM.pdf/9558120)

**A: BAL PMN in Acute Asthma**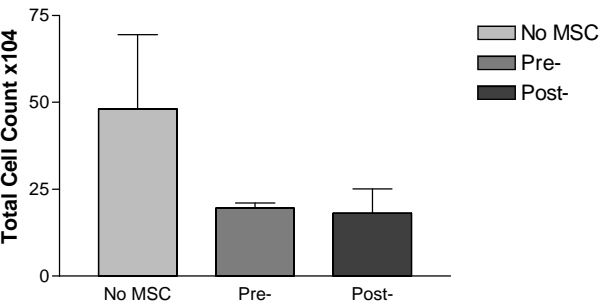**B: Lymphocyte Response**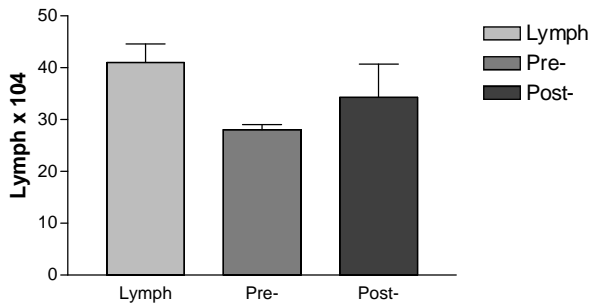**C: Monocyte Response**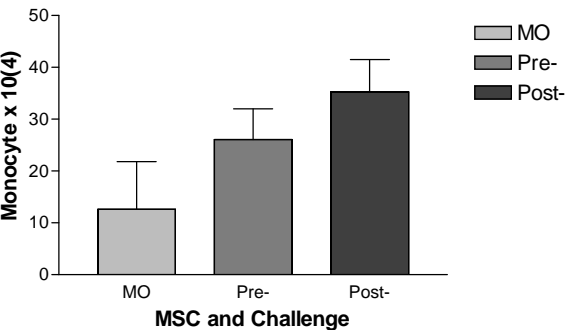**D: Eosinophil Response**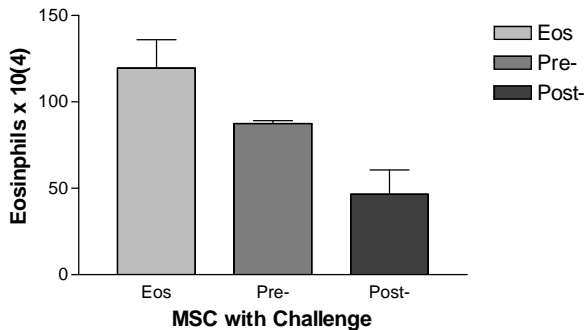

Supplement: MOESM7 [file 9558120]
